# Supplementary material for: Self-assembly, cytocompatibility, and interactions of desmopressin with sodium polystyrene sulfonate
Source: Royal Society of Chemistry journal article supplement (doi:10.1039/d4sm01125b), 2024-01-01
Supplement: d4sm01125b1.pdf [file d4sm01125b1.pdf]

## SUPPORTING INFORMATION

### Self-assembly, Cytocompatibility, and Interactions of Desmopressin with Sodium Polystyrene Sulfonate

Ana B. Caliar<sup>1</sup>, Renata N. Bicev<sup>1,2</sup>, Caroline C. da Silva<sup>1</sup>, Sinval E. G. de Souza<sup>1</sup>, Marta G. da Silva<sup>1</sup>, Louise E. A. Souza<sup>1</sup>, Lucas R. de Mello<sup>1,3</sup>, Ian W. Hamley<sup>3</sup>, Guacyara Motta<sup>4</sup>, J  ril Degrouard<sup>2</sup>, Guillaume Tresset<sup>2</sup>, Alexandre J. C. Quaresma<sup>1</sup>, Clovis R. Nakaie<sup>1</sup>, and Emerson R. da Silva<sup>1,\*</sup>

<sup>1</sup> Departamento de Biof  sica, Universidade Federal de S  o Paulo, S  o Paulo 04062-000, Brazil

<sup>2</sup> Universit   Paris-Saclay, CNRS, Laboratoire de Physique des Solides, 91405 Orsay, France

<sup>3</sup>Department of Chemistry, University of Reading, Reading RG6 6AD, United Kingdom

<sup>4</sup>Departamento de Bioqu  mica, Universidade Federal de S  o Paulo, S  o Paulo 04044-020, Brazil

#### Supplementary methods:

**Preparation of model membranes:** The interactions between desmopressin and lipids were investigated using model membranes prepared from a mixture of phosphatidylcholine, oleic acid, and myristic acid in a 7:2:1 mass ratio. This formulation roughly reproduces the lipid fraction found in biomembranes, which are mostly composed of phospholipids, with phosphatidylcholine being the most abundant.<sup>1</sup> Additionally, fatty acids, among which oleic acid is a major representative, and myristic acid, present at lower concentrations, are also components of these membranes.<sup>2,3</sup> L-  -phosphatidylcholine from soy bean was purchased from Avanti Polar (product code # 441601,  $M_w = 775 \text{ g}\cdot\text{mol}^{-1}$ ), while oleic acid (#O1008,  $M_w = 282.5$ ) and myristic acid (#70079,  $M_w = 228.4$ ) were acquired from Sigma-Aldrich and used as received. The lipids were weighted at the appropriate masses and solubilized in chloroform. The mixture was vigorously stirred until complete homogenization was achieved. Subsequently, the content (approximately 10 ml) was transferred to a round-bottom glass flask, and a stream of dry nitrogen was introduced into the flask and maintained for about 4 hours until complete evaporation of the solvent occurred, resulting in the formation of a lipid film with an average molecular mass calculated at  $M_w = 622.5 \text{ g}\cdot\text{mol}^{-1}$ . This lipid film was reconstituted in PBS buffer (10 mM, pH = 7.2) to form a stock solution of vesicles at a concentration of  $40 \text{ mg}\cdot\text{mL}^{-1}$  (0.64 mM). Samples for cryo-TEM and quenching assays were prepared by diluting these stocks to final concentrations of  $1 \text{ mg}\cdot\text{mL}^{-1}$ . These model membranes have proven useful in previous analysis of peptide-membrane interactions by our group.<sup>4</sup>

## High Performance Liquid Chromatography and mass spectroscopy data:

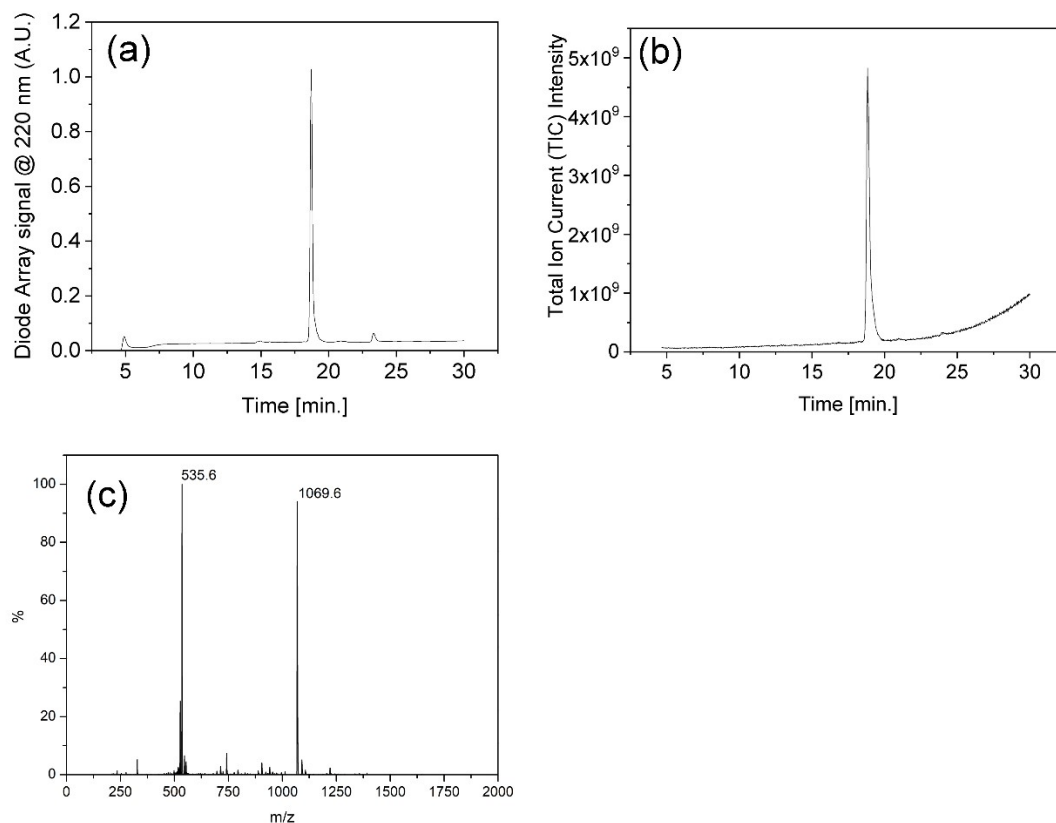

**Figure S1:** HPLC data showing the diode array channel absorbance at 220 nm (a) and the total ion current intensity (b). Desmopressin elution time is found at 18.8 min. In (c), the mass spectrum exhibits fragments found in the corresponding eluted fraction.

## SAXS models used for data fitting:

SAXS data have been fitted using models available in the library of the SASFit package.<sup>5</sup> We reproduce below the relevant equations from the models available in the SASFit manual to provide the reader with an overview of the parameters obtained from the fitting. Further mathematical details on the models used in our analyses can be found in the manual of SASFit (<https://sasfit.org/>) or in comprehensive texts on SAXS data treatment.<sup>6–9</sup> Data from desmopressin solutions were fitted using a combination of a power law plus a generalized Gaussian chains form factor:

$$I(q) \cong Bkg + \frac{A}{q^\alpha} + \frac{I_0 \cdot U^{\frac{1}{2\nu}} \cdot \Gamma\left(\frac{1}{2\nu}\right) - \Gamma\left(\frac{1}{\nu}\right) - U^{\frac{1}{2\nu}} \cdot \Gamma\left(\frac{1}{2\nu}, U\right) + \Gamma\left(\frac{1}{\nu}, U\right)}{v \cdot U^{\frac{1}{\nu}}} \quad (S1)$$

Where  $U$  is given by:

$$U = (2\nu + 1)(2\nu + 2) \frac{q^2 \cdot R_g^2}{6} \quad (S2)$$

In equation (S1),  $Bkg$  is an additive constant accounting for a flat background. The second term is a power law that describes the linear decay (in log-log representation) observed at the low- $q$  region, where  $A$  is a factor weighing the contribution of the power law component to the whole scattering. In our analyses, the scattering at the low- $q$  region is ascribed to large desmopressin aggregates whose dimensions are larger than the experimental window achievable in our experiments (see main text). The parameter  $\alpha$  is the scaling exponent, which carries structural information on the fractal dimensionality of aggregates and, depending on the value it assumes, two types of fractal aggregates can be identified:<sup>7,10</sup> if  $2 < \alpha < 3$ , it indicates that the sample is populated by mass fractals and their fractal dimension is given by  $D_m = \alpha$ . If  $3 < \alpha < 4$ , it indicates presence of surface fractals, and the fractal dimension is given by  $D_s = 6 - \alpha$ . The third term is more complex, and it corresponds to the generalized Gaussian chain form factor.<sup>6</sup> In our case here, this term is introduced in the model to describe scattering at higher  $q$ -values which is ascribed to the presence of free peptide chains in the solutions. The symbol  $\Gamma$  represents the gamma function, and the parameters  $\nu$  and  $R_g$  are associated with the Flory exponent and the gyration radius of the chains, respectively. The Flory exponent carries information on the interaction between peptide chains and the surrounding solvent: a  $\nu = 0.6$  indicates that the chain is swollen (good solvent), a  $\nu = 0.33$  points to a collapsed coil (poor solvent), and a  $\nu = 0.5$  suggests a theta solvent (meaning that the chains interact equally with the solvent and themselves).<sup>11</sup> The gyration radius,  $R_g$ , is a measure of the size of the region occupied by the chain and is analogous to the radius of an equivalent sphere that would occupy the same volume as the chains.

In the case of NaPSS solutions, SAXS data were fitted by using a Porod cylinder form factor whose expression is given by:

$$P_{cyl}(q,R,L) = \frac{2}{qL}(\Delta\eta R^2L)^2 \times \left\{ Si_{\frac{\pi}{2}}(qL)\Lambda_1^2(qR) - \frac{2\Lambda_2(2qR) - \Phi(2qR)}{qL} - \frac{\sin(qL)}{(qL)^2} \right\} \quad (S4)$$

Where the modified sine integral function is given by:

$$Si_{\frac{\pi}{2}}(qL) = \left( Si(qL) + \frac{\cos(qL)}{qL} + \frac{\sin(qL)}{(qL)^2} \right) \xrightarrow{qL \rightarrow \infty} \frac{\pi}{2} \quad (S5)$$

$$\text{And } \Lambda_1(x) = \frac{2}{qL}J_1(qL), \quad \Lambda_2(x) = \frac{8}{(qL)^2}J_2(qL), \quad \text{and } \Phi(x) = \frac{2}{(qL)^2}[1 - \Lambda_1(qL)].$$

With  $J_1$  and  $J_2$  denoting first kind Bessel functions of 1<sup>st</sup> and 2<sup>nd</sup> order, respectively.  $R$  is the radius of the cylinder,  $L$  is the length (in our case arbitrarily assumed to be long and fixed at 1000 nm), and  $\Delta\eta$  is the difference between electron densities of the scattering objects (peptide, polymer, complexes, etc.) and the surrounding solvent.

#### Cryo-TEM image of lipid vesicles used in quenching assays:

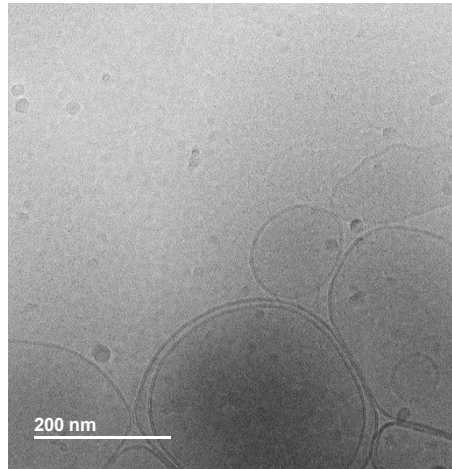

**Figure S2:** Cryo-TEM image of lipid vesicles used in quenching assays to investigate interactions with desmopressin.

#### Study of yield during the cleavage step:

**Table S1.** Summary of parameters showing the yield during the cleavage step.

| Dilution<br>(mmol:litre) | Peak area |        |   | Yield |   |
|--------------------------|-----------|--------|---|-------|---|
|                          | Standard  | Sample | % | mg    | % |

|            |           |           |    |       |    |
|------------|-----------|-----------|----|-------|----|
| <b>1:1</b> | 1.889.981 | 3.161.251 | 95 | 167.3 | 17 |
| <b>1:3</b> | 1.896.784 | 2.123.855 | 90 | 335.9 | 34 |
| <b>1:6</b> | 1.889.981 | 1.023.936 | 89 | 325.0 | 33 |
| <b>1:9</b> | 1.889.981 | 772.776   | 92 | 368.0 | 38 |

Obs: Cleavage with 1 mmol of peptide resin, extraction with ethyl acetate, and injection volume of 10  $\mu$ L.

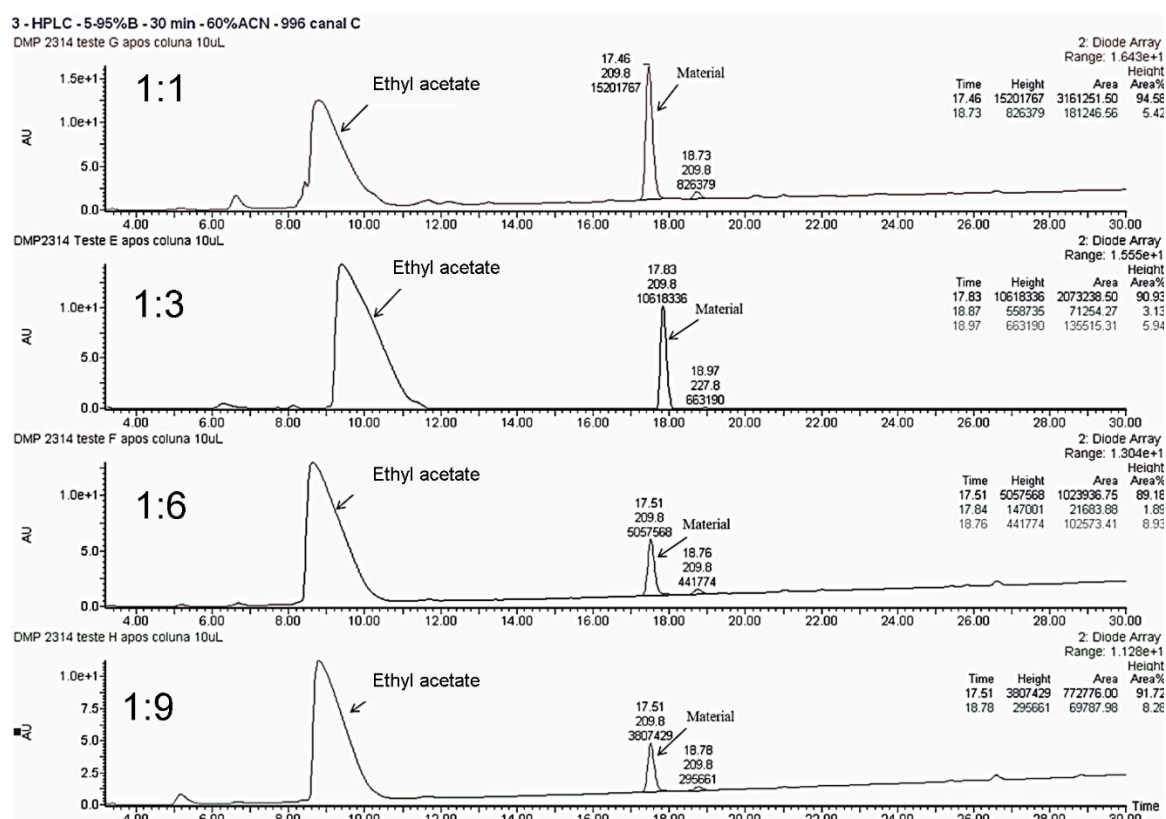

**Figure S3.** Chromatography profiles of samples at the different dilutions.

**ThT fluorescence in the presence of lipid membranes:**

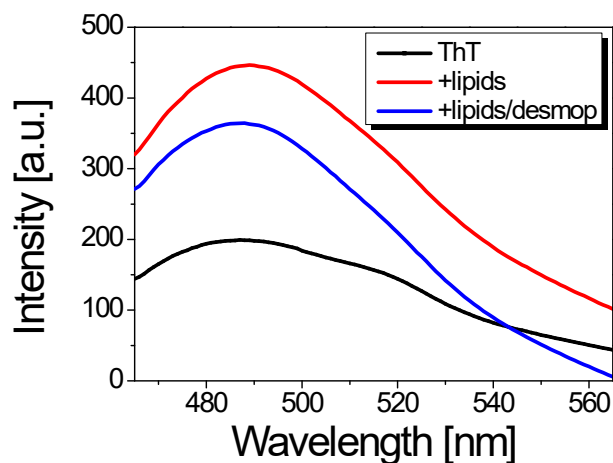

**Figure S4.** ThT fluorescence in mixtures containing 1 mg/mL lipids or 1 mg/mL lipids and 0.5 mg/mL desmopressin.

**Supplementary CD experiments in protamine/NaPSS:**

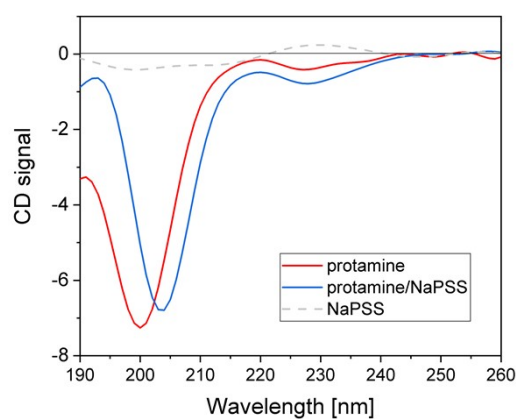

**Figure S5.** CD spectra of solutions containing mixtures of  $128 \mu\text{g}\cdot\text{mL}^{-1}$  NaPSS with  $100 \mu\text{g}\cdot\text{mL}^{-1}$  protamine, a peptide which does not exhibit aggregating capabilities.

**Supplementary AFM images:**

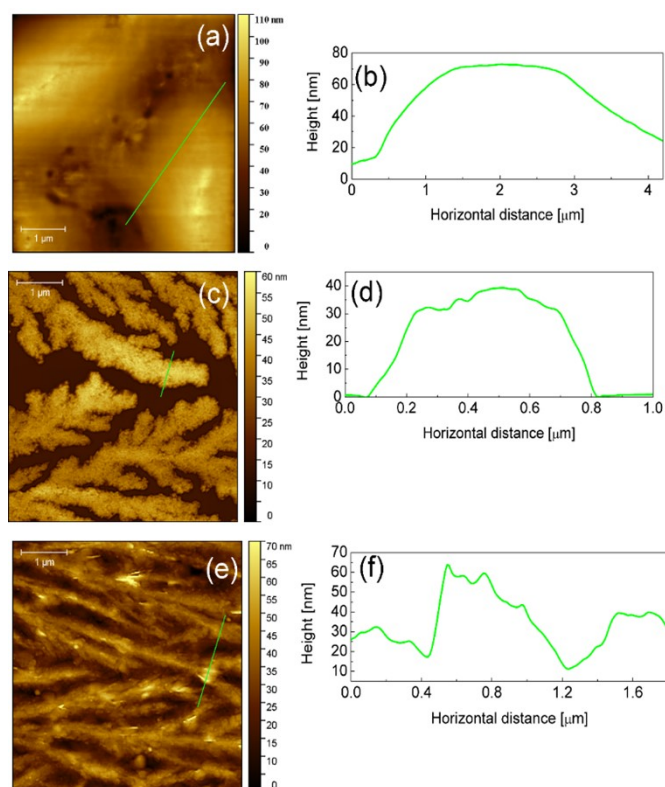

**Figure S6.** Height profiles across images shown in the main text (Figures 5, 6, and 7). (a) and (b) desmopressin; (c) and (d) NaPSS; (e) and (f) desmopressin/NaPSS.

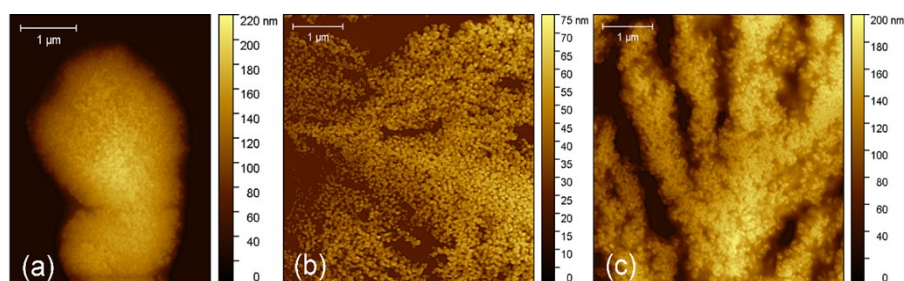

**Figure S7.** Topography images of NaPSS on gold substrates. (a) polymer aggregate; (b) spread NaPSS grains; (c) polymer ramifications.

**Average infrared spectra shown in Figures 5 and 6:**

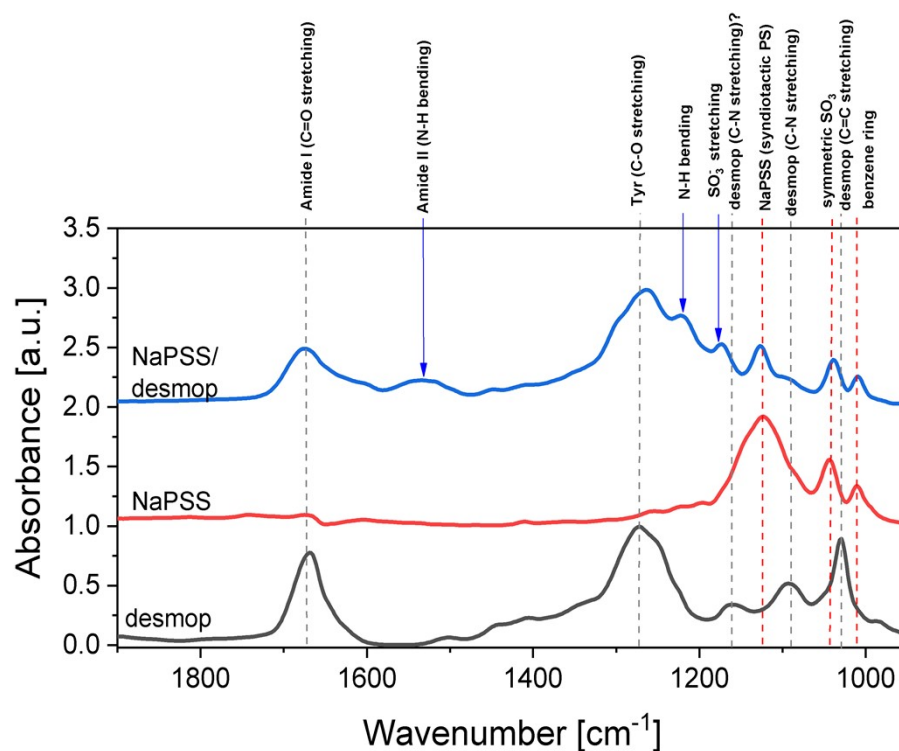

**Figure S8.** Average spectra from infrared are shown in Figures 5b, 5d, and 6b (main text). Dashed lines indicate resonances associated with desmopressin (gray) and NaPSS (red). Blue arrows highlight new peaks that emerge in the spectra of NaPSS/desmopressin complexes with their tentative assignments.

### Resazurin assays data:

**Table S2.** Data of cell viability obtained in resazurin assays. The raw data (in black) represent the fluorescence of resorufin, which results from the reduction of resazurin in the mitochondria of viable cells. Percentages (in blue) were determined relative to the average of all control well on each plate. Total averages (red) were determined from viability percentages obtained on both days. Significance was assessed using the Welch's t-test (unequally variances).

## Supplementary references

- S9

- 7 J. Teixeira, *J. Appl. Crystallogr.*, 1988, **21**, 781–785.
- 8 I. W. Hamley, *Small-Angle Scattering: Theory, Instrumentation, Data and Applications*, Wiley, Chichester, 1st edn., 2021.
- 9 T. Zemb and P. Lindner, *Neutrons, X-rays and light: scattering methods applied to soft condensed matter*, Elsevier, Amsterdam ; Boston, 1st edn., 2002.
- 10 B. Hammouda, *J. Chem. Phys.*, 2010, **133**, 84901.
- 11 I. W. Hamley, in *Introduction to Soft Matter*, John Wiley & Sons, Ltd, 2007, pp. 39–110.
